# Supplementary material for: Comparison of Bacterial Communities from the Surface and Adjacent Bottom Layers Water of Billings Reservoir
Source: Research Square preprint supplement (doi:10.21203/rs.3.rs-603189/v1), 2021-06-16
Supplement: Supplementary file 1 [file c147b1fad25525ce8fc3daf7.xlsx]

## Sheet: Orthology
Table S2. Functional biomarkers computed by the LEfSe analysis
Ortholog	Definition	Pathway	Module	LDA effect size	p-value	p-value (FDR)	Surface	Bottom layer
K02005	HlyD family secretion protein			2.33422	0.006473	0.182861	0.2496	0.2903
K02014	iron complex outermembrane recepter protein			1.89756	0.02143	0.319636	0.0503	0.0636
K07117	uncharacterized protein			1.50027	0.01562	0.283987	0.0255	0.0304
K03633	chromosome partition protein MukF			1.43925	0.020137	0.312831	0.027	0.032
K06759	contactin 1	ko04514		1.36729	0.009175	0.217653	0.019	0.0234
K17481	myosin XVI			1.36359	0.030813	0.374998	0.0189	0.0231
K03559	biopolymer transport protein ExbD			1.34815	0.032679	0.382146	0.0431	0.0464
K03623	ribonuclease inhibitor			1.33736	0.046024	0.433688	0.0212	0.0252
K15366	salmonella plasmid virulence protein B	ko05132		1.30929	0.04114	0.411811	0.0181	0.0217
K01443	N-acetylglucosamine-6-phosphate deacetylase	ko00520, ko01130		1.29152	0.029039	0.366002	0.0271	0.0238
K07132	ATP-dependent target DNA activator			1.26676	0.020137	0.312831	0.0105	0.0138
K03761	MFS transporter, MHS family, alpha-ketoglutarate permease			1.25372	0.036702	0.398338	0.0152	0.0182
K02067	phospholipid/cholesterol/gamma-HCH transport system substrate-binding protein	ko02010	M00210, M00669, M00670	1.24383	0.038867	0.403661	0.0298	0.0265
K06142	outer membrane protein			1.24063	0.016656	0.291485	0.0144	0.0171
K01197	hyaluronoglucosaminidase	ko00531, ko01100	M00076, M00077	1.22487	0.04114	0.411811	0.0129	0.0159
K18687	HIP---CoA ligase	ko00984, ko01100, ko01120		1.21327	0.036702	0.398338	0.014	0.0169
K15658	arthrofactin-type cyclic lipopeptide synthetase A			1.20774	0.004852	0.1556	0.0126	0.0155
K07163	uncharacterized protein			1.18839	0.043524	0.422655	0.0108	0.0136
K02546	BlaI family transcriptional regulator, methicillin resistance regulatory protein	ko01501	M00625	1.18151	0.048644	0.439529	0.0121	0.0148
K04057	type III secretion protein P	ko03070	M00332	1.17945	0.04114	0.411811	0.0067	0.0094
K02406	flagellin	ko02020, ko02040, ko04621, ko04626, ko05132, ko05134		1.17743	0.007453	0.192717	0.0106	0.0132
K01092	myo-inositol-1(or 4)-monophosphatase	ko00521, ko00562, ko01100, ko04070	M00131	1.15949	0.027354	0.356414	0.0823	0.0798
K15169	mediator of RNA polymerase II transcription subunit 26			1.15511	0.043524	0.422655	0.0102	0.0127
K03764	MetJ family transcriptional regulator, methionine regulon repressor			1.13584	0.006947	0.188098	0.0102	0.0126
K03814	monofunctional glycosyltransferase	ko00550		1.12863	0.022795	0.32884	0.0147	0.0168
K06143	inner membrane protein			1.1235	0.003888	0.137032	0.0097	0.012
K02388	flagellar basal-body rod protein FlgC	ko02040		1.1204	0.000934	0.058171	0.0082	0.0106
K08231	MFS transporter, MCP family, solute carrier family 16 (monocarboxylic acid transporters), member 2	ko04919		1.11791	0.038867	0.403661	0.0104	0.0127
K07253	phenylpyruvate tautomerase	ko00350, ko00360		1.1177	0.030813	0.374998	0.012	0.0143
K07606	vimentin	ko05169, ko05206		1.11519	0.020137	0.312831	0.0086	0.0109
K00046	gluconate 5-dehydrogenase			1.11031	0.046024	0.433688	0.0565	0.0544
K02415	flagellar FliL protein			1.10819	0.04114	0.411811	0.0097	0.0119
K02408	flagellar hook-basal body complex protein FliE	ko02040		1.10549	0.036702	0.398338	0.0102	0.0124
K02405	RNA polymerase sigma factor for flagellar operon FliA	ko02020, ko02025, ko02026, ko02040, ko05111		1.10063	0.032679	0.382146	0.0105	0.0127
K04053	type III secretion protein I		M00332	1.08963	0.022795	0.32884	0.0084	0.0106
K02400	flagellar biosynthesis protein FlhA	ko02040		1.08399	0.04114	0.411811	0.0097	0.0118
K02386	flagella basal body P-ring formation protein FlgA	ko02040		1.07819	0.048644	0.439529	0.0098	0.0119
K18290	itaconyl-CoA hydratase	ko00660		1.07508	0.020137	0.312831	0.0111	0.013
K07100	putative phosphoribosyl transferase			1.07421	0.046024	0.433688	0.0176	0.0155
K14586	2-naphthoate monooxygenase	ko00626, ko01120		1.06954	0.01464	0.273844	0.0089	0.011
K02409	flagellar M-ring protein FliF	ko02040		1.06842	0.048644	0.439529	0.0097	0.0117
K08156	MFS transporter, DHA1 family, arabinose polymer utilization protein			1.06645	0.003345	0.124681	0.0092	0.0113
K14805	ATP-dependent RNA helicase DDX24/MAK5			1.0613	0.043524	0.422655	0.0135	0.0154
K13869	solute carrier family 7 (L-type amino acid transporter), member 11	ko04216		1.04149	0.01202	0.247426	0.0085	0.0104
K02422	flagellar protein FliS	ko02040		1.04	0.025754	0.346752	0.0087	0.0105
K02404	flagellar biosynthesis protein FlhF			1.03981	0.006027	0.175931	0.0128	0.0147
K01236	maltooligosyltrehalose trehalohydrolase	ko00500, ko01100, ko01110	M00565	1.03705	0.03464	0.390129	0.0213	0.0197
K02397	flagellar hook-associated protein 3 FlgL	ko02040		1.03688	0.024236	0.337246	0.0075	0.0094
K07055	tRNA wybutosine-synthesizing protein 2			1.0304	0.01562	0.283987	0.0063	0.0082
K02661	type IV pilus assembly protein PilK	ko02020		1.01534	0.004509	0.149739	0.0061	0.0079
K03399	cobalt-precorrin-7 (C5)-methyltransferase	ko00860, ko01100		1.01166	0.020137	0.312831	0.0056	0.0073
K02420	flagellar biosynthetic protein FliQ	ko02040		1.00959	0.00266	0.107742	0.0069	0.0086
K07274	MipA family protein			1.00777	0.002462	0.103941	0.0058	0.0075
K00364	GMP reductase	ko00230		1.00509	0.024236	0.337246	0.0069	0.0087
K02613	ring-1,2-phenylacetyl-CoA epoxidase subunit PaaE	ko00360, ko01120		1.0035	0.024236	0.337246	0.0149	0.0166
K04075	tRNA(Ile)-lysidine synthase			1.00302	0.02143	0.319636	0.0309	0.0325
K01169	ribonuclease I (enterobacter ribonuclease)			1.00046	0.00266	0.107742	0.0062	0.008
K02556	chemotaxis protein MotA	ko02020, ko02030, ko02040		0.996781	0.022795	0.32884	0.0036	0.0052
K01451	hippurate hydrolase	ko00360		0.995914	0.032679	0.382146	0.0096	0.0109
K15656	surfactin family lipopeptide synthetase C	ko01054, ko02024		0.993235	0.00036	0.030221	0.0048	0.0065
K00414	ubiquinol-cytochrome c reductase core subunit 1	ko00190, ko01100, ko04260, ko04714, ko04932, ko05010, ko05012, ko05016	M00152	0.992413	0.003607	0.13117	0.0066	0.0083
K00290	saccharopine dehydrogenase (NAD+, L-lysine forming)	ko00300, ko00310, ko01100, ko01110, ko01130, ko01230	M00030, M00032	0.991967	0.03464	0.390129	0.0336	0.0353
K00065	2-dehydro-3-deoxy-D-gluconate 5-dehydrogenase	ko00040		0.990753	0.046024	0.433688	0.0256	0.024
K02411	flagellar assembly protein FliH	ko02040		0.987023	0.001412	0.073249	0.0089	0.0105
K09797	uncharacterized protein			0.983796	0.016656	0.291485	0.0084	0.01
K04706	E3 SUMO-protein ligase PIAS1	ko04120, ko04630, ko05160		0.981529	0.00043	0.03419	0.0048	0.0064
K09861	uncharacterized protein			0.970782	0.012843	0.255574	0.0083	0.0096
K02391	flagellar basal-body rod protein FlgF	ko02040		0.967447	0.005218	0.162135	0.0053	0.0068
K02665	type IV pilus assembly protein PilP			0.966371	0.011243	0.239021	0.0063	0.0079
K07649	two-component system, OmpR family, sensor histidine kinase TctE	ko02020	M00457	0.962973	0.043524	0.422655	0.0073	0.0086
K03081				0.962088	0.008565	0.209164	0.006	0.0075
K03260	translation initiation factor 4G	ko03013, ko05416	M00428	0.961637	0.029039	0.366002	0.0083	0.0098
K05374	yersiniabactin synthetase, thioesterase component			0.954834	0.007992	0.201079	0.0093	0.0109
K06011	botulinum neurotoxin			0.952415	0.000394	0.032141	0.0055	0.007
K06128	lysophospholipase I	ko00564, ko05231		0.950976	0.003888	0.137032	0.0068	0.0083
K00645	[acyl-carrier-protein] S-malonyltransferase	ko00061, ko00333, ko01100, ko01130, ko01212	M00082	0.950871	0.017753	0.30081	0.0317	0.0331
K06176	tRNA pseudouridine13 synthase			0.950689	0.048644	0.439529	0.0123	0.0138
K13244	c-di-GMP-specific phosphodiesterase			0.949713	0.024236	0.337246	0.0059	0.0074
K07040	uncharacterized protein			0.948796	0.002106	0.093657	0.0352	0.0367
K06078	murein lipoprotein			0.948043	0.000229	0.021213	0.0055	0.0071
K00234	succinate dehydrogenase (ubiquinone) flavoprotein subunit	ko00020, ko00190, ko01100, ko01110, ko01120, ko01130, ko01200, ko04714, ko04932, ko05010, ko05012, ko05016	M00009, M00011, M00148	0.944603	0.03464	0.390129	0.0108	0.0124
K06139	pyrroloquinoline quinone biosynthesis protein E			0.937624	0.007453	0.192717	0.0065	0.0078
K04713	sphinganine C4-monooxygenase	ko00600, ko01100		0.936382	0.007453	0.192717	0.0058	0.0072

## Sheet: Module (PICRUSt)
Module	Definition	Orthology	Pathway	LDA effect size	p-value	p-value (FDR)	Surface	Bottom layer
M00670	Mce transport system	K02067		1.72428	0.046024	0.85505	0.1569	0.146
M00841	Tetrahydrofolate biosynthesis, mediated by PTPS, GTP => THF		ko00790, ko01100	1.69672	0.04114	0.85505	0.2989	0.309
M00109	C21-Steroid hormone biosynthesis, progesterone => cortisol/cortisone		ko00140, ko01100	1.5926	0.048644	0.85505	0.1022	0.1073

## Sheet: Module (MinPath)
Module	Definition	Orthology	Pathway	LDA effect size	p-value	p-value (FDR)	Surface	Bottom layer
M00251	Teichoic acid transport system		ko02010	2.00714	0.032679	0.731069	0.1574	0.1777
M00150	Fumarate reductase, prokaryotes		ko00190	1.95151	0.022795	0.63746	0.0983	0.1143
M00044	Tyrosine degradation, tyrosine => homogentisate		ko00350, ko01100	1.86274	0.020137	0.630683	0.3141	0.3004

## Sheet: Pathway (PICRUSt)
Pathway	Definition	Module	Orthology	LDA effect size	p-value	p-value (FDR)	Surface	Bottom layer
ko02040	Flagellar assembly		K02386, K02388, K02391, K02397, K02400, K02405, K02406, K02408, K02409, K02411, K02420, K02422, K02556	2.24774	0.022795	0.895852	0.1818	0.2157

## Sheet: Pathway (MinPath)
Pathway	Definition	Module	Orthology	LDA effect size	p-value	p-value (FDR)	Surface	Bottom layer
ko00360	Phenylalanine metabolism	M00350, M00545	K01451, K02613, K07253	2.31482	0.027354	0.409127	0.3543	0.3985
ko01522	Endocrine resistance			2.21033	0.032679	0.409127	0.1525	0.1855
